# Supplementary material for: One-step synthesis of Fe3O4/carboxylate-rich carbon composite and its application for Cu(ii) removal
Source: Royal Society of Chemistry journal article supplement (doi:10.1039/c5nj02545a), 2016-01-01
Supplement: c5nj02545a1.pdf [file c5nj02545a1.pdf]

## Supporting Information for

### One-step synthesis of Fe<sub>3</sub>O<sub>4</sub>/carboxylate-rich carbon composite and its application for Cu (II) removal

Lingling Qu,<sup>a,c</sup> Jianzhong Jia,<sup>b</sup> Hefei Shi<sup>b</sup> and Zhijun Luo<sup>\*b,c</sup>

<sup>a</sup> School of Chemistry and Chemical Engineering, Jiangsu University, Zhenjiang,  
212013, P. R. China

<sup>b</sup> School of The Environment, Jiangsu University, Zhenjiang, 212013 P. R. China; E-  
mail: lzj@ujs.edu.cn

<sup>c</sup> State Key Laboratory of Coordination Chemistry, Nanjing University, Nanjing  
210093, P. R. China

Corresponding author. Tel.: +86 511 88790955

E-mail address: lzj@ujs.edu.cn

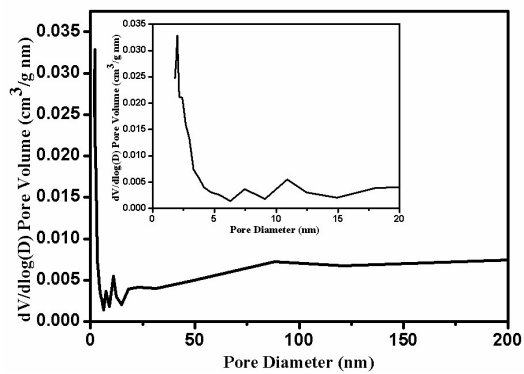

Fig. S1. pore size distribution of  $\text{Fe}_3\text{O}_4/\text{CRC}$ .

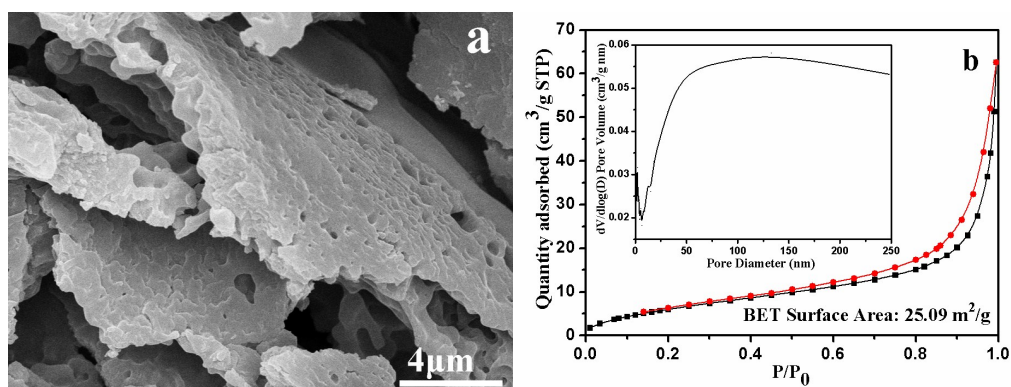

Fig. S2. SEM image (a) and Nitrogen adsorption/desorption isotherms and pore size distribution (inset) (b) of CRC

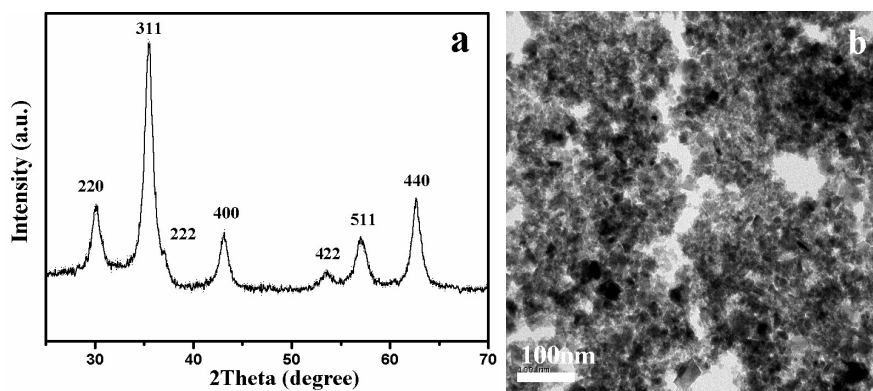

Fig. S3. The XRD pattern (a) and TEM image (b) of the  $\text{Fe}_3\text{O}_4$  nanoparticles
